# Supplementary material for: The GAAS Metagenomic Tool and Its Estimations of Viral and Microbial Average Genome Size in Four Major Biomes
Source: PubMed Central journal article supplement (PMC2781106; doi:10.1371/journal.pcbi.1000593), 2009-12-11
Supplement: pcbi.1000593.s003.pdf [file pcbi.1000593.s003.pdf]

**Table S2: Detail of the 169 metagenomes used for the meta-analysis and their average genome size estimated by GAAS. Accession numbers: CA, CAMERA Accession; GB, NCBI GenBank; GP, NCBI Genome Project; GSS, NCBI Genome Survey Sequence; MG: MG-RAST Accession; SRA, NCBI Short Read Archive.**

| Metagenome name                   | Type      | Biome           | Sub-biome   | Microbial-viral pairing | Accession number      | Reference                                            | Est. avg. genome length (kb) |
|-----------------------------------|-----------|-----------------|-------------|-------------------------|-----------------------|------------------------------------------------------|------------------------------|
| AlaskanSoilFungalEuk              | eukaryal  | Terrestrial     | -           | -                       | GP 28853              | Allen et al., ISME J., 2009 [1]                      | -                            |
| AlicanteSalternMic                | microbial | Aquatic         | Hypersaline | -                       | GSS DU824018-DU826964 | Legault et al., BMC Genomics 2006 [2]                | 3,190.26                     |
| AlvinellaWormMic                  | microbial | Host-associated | -           | -                       | GP 17241              | Grzymiski et al., Proc. Nat. Acad. Sci. USA 2008 [3] | 2,351.67                     |
| AntarcticaLakeMic                 | microbial | Aquatic         | Hypersaline | -                       | GP 33179              | -                                                    | 1,657.26                     |
| ArcticMic                         | microbial | Aquatic         | Ocean       | Arctic Ocean            | GP 29035              | -                                                    | 1,606.13                     |
| ArcticVir2002                     | viral     | Aquatic         | Ocean       | Arctic Ocean            | GP 17769              | Angly et al., PLoS Biology 2006 [4]                  | 66.67                        |
| BabyFecesSDVirus                  | viral     | Host-associated | -           | -                       | GB ED651217-ED651693  | Breitbart et al., Res. Microbiol. 2008 [5]           | -                            |
| BBCVir1996to2004                  | viral     | Aquatic         | Ocean       | -                       | GP 17767              | Angly et al., PLoS Biology 2006 [4]                  | 42.75                        |
| BearpawHotSpringVir               | viral     | Aquatic         | Hot spring  | -                       | GP 18929              | Pride et al., BMC Genomics 2008 [6]                  | -                            |
| ChesapeakeBayVir                  | viral     | Aquatic         | Ocean       | Chesapeake Bay          | GP 16522              | Bench et al., Appl. Environ. Microbiol. 2007 [7]     | 112.38                       |
| ChickenCecumCJejuniMic2007        | microbial | Host-associated | -           | Chicken Cecum           | GP 28599              | Qu A et al., PLoS One, 2008 [8]                      | 3,695.38                     |
| ChickenCecumUninfectedMic2007     | microbial | Host-associated | -           | Chicken cecum           | GP 28597              | Qu A et al., PLoS One, 2008 [8]                      | -                            |
| ChickenRuntingStuntingMDnaVir2008 | viral     | Host-associated | -           | Chicken cecum           | GP 40783              | -                                                    | 39.77                        |
| ChickenRuntingStuntingMRnaVir2008 | viral     | Host-associated | -           | Chicken cecum           | GP 40785              | -                                                    | 41.99                        |

|                                           |           |                            |       |                         |                           |                                                                |          |
|-------------------------------------------|-----------|----------------------------|-------|-------------------------|---------------------------|----------------------------------------------------------------|----------|
| ChickenRunting<br>StuntingPDnaV<br>ir2008 | viral     | Host-<br>associated        | -     | Chicken<br>cecum        | GP 40787                  | -                                                              | 31.10    |
| ChickenRunting<br>StuntingPRnaVi<br>r2008 | viral     | Host-<br>associated        | -     | Chicken<br>cecum        | GP 40789                  | -                                                              | 6.93     |
| ConPorCompH<br>awMic200602                | microbial | Manipulated<br>/ Perturbed | -     | Control<br>Pcomp        | GP 28429                  | Vega Thurber et al.,<br>Env. Mic. 2009 [9]                     | 2,077.79 |
| ConPorCompH<br>awVir200602                | viral     | Manipulated<br>/ Perturbed | -     | Control<br>Pcomp        | GP 28417                  | Vega Thurber et al.,<br>Proc. Nat. Acad.<br>Sci. USA 2008 [10] | 19.90    |
| DesertSoilJoshu<br>aTreeVir               | viral     | Terrestrial                | -     | -                       | GSS ER781257-<br>ER785833 | Fierer et al., Appl.<br>Environ. Microb.<br>2007 [11]          | -        |
| DOCPorComp<br>HawMic200602                | microbial | Manipulated<br>/ Perturbed | -     | DOC<br>Pcomp            | GP 28433                  | Vega Thurber et al.,<br>Env. Mic. 2009 [9]                     | 2,630.08 |
| DOCPorComp<br>VirHaw200602                | viral     | Manipulated<br>/ Perturbed | -     | DOC<br>Pcomp            | GP 28421                  | Vega Thurber et al.,<br>Proc. Nat. Acad.<br>Sci. USA 2008 [11] | 28.61    |
| FannLIMic2005<br>0811                     | microbial | Aquatic                    | Ocean | Fanning<br>island       | GP 28367                  | Dinsdale et al.,<br>PLoS One 2008<br>[12]                      | 2,638.17 |
| FannLIVir2005<br>0811                     | viral     | Aquatic                    | Ocean | Fanning<br>island       | GP 28369                  | Dinsdale et al.,<br>PLoS One 2008<br>[12]                      | 152.09   |
| FishHealGutKe<br>ntSTMic200605<br>04      | microbial | Host-<br>associated        | -     | Fish gut                | GP 28389                  | Dinsdale et al.,<br>Nature 2008 [13]                           | 5,234.77 |
| FishHealGutKe<br>ntSTVir200605<br>04      | viral     | Host-<br>associated        | -     | Fish gut                | GP 28397                  | -                                                              | -        |
| FishHealSlimK<br>entSTMic20060<br>504     | microbial | Host-<br>associated        | -     | Fish slime              | GP 28393                  | Dinsdale et al.,<br>Nature 2008 [13]                           | 5,229.78 |
| FishHealSlimK<br>entSTVir20060<br>504     | viral     | Host-<br>associated        | -     | Fish slime              | GP 28401                  | Dinsdale et al.,<br>Nature 2008 [13]                           | 13.23    |
| FishMorGutKe<br>ntSTMic200605<br>04       | microbial | Manipulated<br>/ Perturbed | -     | Fish<br>Morbid Gut      | GP 28391                  | Dinsdale et al.,<br>Nature 2008 [13]                           | 5,260.79 |
| FishMorGutKe<br>ntSTVir200605<br>04       | viral     | Manipulated<br>/ Perturbed | -     | Fish<br>Morbid Gut      | GP 28399                  | -                                                              | -        |
| FishMorSlimKe<br>ntSTMic200605<br>04      | microbial | Manipulated<br>/ Perturbed | -     | Fish<br>Morbid<br>Slime | GP 28395                  | Dinsdale et al.,<br>Nature 2008 [13]                           | 5,126.12 |

|                                      |           |                            |       |                         |          |                                        |           |
|--------------------------------------|-----------|----------------------------|-------|-------------------------|----------|----------------------------------------|-----------|
| FishMorSlimKe<br>ntSTVir200605<br>04 | viral     | Manipulated<br>/ Perturbed | -     | Fish<br>Morbid<br>Slime | GP 28403 | Dinsdale et al.,<br>Nature 2008 [13]   | 31.57     |
| GOMVir1994to<br>2001                 | viral     | Aquatic                    | Ocean | Gulf of<br>Mexico       | GP 17765 | Angly et al., PLoS<br>Biology 2006 [4] | 61.04     |
| GS000a11Mic                          | microbial | Aquatic                    | Ocean | Sargasso<br>Sea         | GP 13694 | Venter et al.,<br>Science 2004 [14]    | 5,465.57  |
| GS000a13Mic                          | microbial | Aquatic                    | Ocean | Sargasso<br>Sea         | GP 13694 | Venter et al.,<br>Science 2004 [14]    | 5,465.57  |
| GS000b11Mic                          | microbial | Aquatic                    | Ocean | Sargasso<br>Sea         | GP 13694 | Venter et al.,<br>Science 2004 [14]    | 1,948.84  |
| GS000b13Mic                          | microbial | Aquatic                    | Ocean | Sargasso<br>Sea         | GP 13694 | Venter et al.,<br>Science 2004 [14]    | 1,948.84  |
| GS000cMic                            | microbial | Aquatic                    | Ocean | Sargasso<br>Sea         | GP 13694 | Venter et al.,<br>Science 2004 [14]    | 2,292.36  |
| GS000dMic                            | microbial | Aquatic                    | Ocean | Sargasso<br>Sea         | GP 13694 | Venter et al.,<br>Science 2004 [14]    | 1,599.07  |
| GS001aEuk                            | eukaryal  | Aquatic                    | Ocean | -                       | GP 13694 | Venter et al., [14]<br>Science 2004    | 24,690.91 |
| GS001bEuk                            | eukaryal  | Aquatic                    | Ocean | -                       | GP 13694 | Venter et al.,<br>Science 2004 [14]    | 6,921.47  |
| GS011Mic                             | microbial | Aquatic                    | Ocean | -                       | GP 13694 | Rush et al., PLoS<br>Biol. 2007 [15]   | 1,543.51  |
| GS012Mic                             | microbial | Aquatic                    | Ocean | Chesapeake<br>Bay       | GP 13694 | Rush et al., PLoS<br>Biol. 2007 [15]   | 1,658.76  |
| GS016Mic                             | microbial | Aquatic                    | Ocean | Gulf of<br>Mexico       | GP 13694 | Rush et al., PLoS<br>Biol. 2007 [15]   | 1,564.53  |
| GS020Mic                             | microbial | Aquatic                    | Ocean | -                       | GP 13694 | Rush et al., PLoS<br>Biol. 2007 [15]   | 2,896.19  |
| GS023Mic                             | microbial | Aquatic                    | Ocean | -                       | GP 13694 | Rush et al., PLoS<br>Biol. 2007 [15]   | 1,671.19  |
| GS025Euk                             | eukaryal  | Aquatic                    | Ocean | -                       | GP 19735 | Rush et al., PLoS<br>Biol. 2007 [15]   | 895.31    |
| GS034Mic                             | microbial | Aquatic                    | Ocean | -                       | GP 13694 | Rush et al., PLoS<br>Biol. 2007 [15]   | 2,002.14  |
| GS048aMic                            | microbial | Aquatic                    | Ocean | -                       | GP 13694 | Rush et al., PLoS<br>Biol. 2007 [15]   | 1,718.17  |
| GS048bEuk                            | eukaryal  | Aquatic                    | Ocean | -                       | GP 13694 | Rush et al., PLoS<br>Biol. 2007 [15]   | 691.96    |
| GS108bEuk                            | eukaryal  | Aquatic                    | Ocean | -                       | GP 13694 | -                                      | 686.97    |
| GS110bEuk                            | eukaryal  | Aquatic                    | Ocean | -                       | GP 13694 | -                                      | 935.95    |
| GS112bEuk                            | eukaryal  | Aquatic                    | Ocean | -                       | GP 13694 | -                                      | 782.20    |
| GS117bEuk                            | eukaryal  | Aquatic                    | Ocean | -                       | GP 13694 | -                                      | 765.82    |

|                             |           |                 |               |                        |                                          |                                   |          |
|-----------------------------|-----------|-----------------|---------------|------------------------|------------------------------------------|-----------------------------------|----------|
| GS122bEuk                   | eukaryal  | Aquatic         | Ocean         | -                      | GP 13694                                 | -                                 | 719.78   |
| GutlessWormMic              | microbial | Host-associated | -             | -                      | GB AASZ01000000                          | Woyke et al., Nature 2006 [16]    | 522.88   |
| HBCStromBahamasMic20050111  | microbial | Aquatic         | Microbialites | Bahamas                | GP 28383                                 | Dinsdale et al., Nature 2008 [13] | 4,125.02 |
| HBCStromBahamasVir20050111  | viral     | Aquatic         | Microbialites | Bahamas                | GP 28381                                 | Desnues et al., Nature 2008 [17]  | 4.63     |
| HealSputRep3SDVir20060707   | viral     | Host-associated | -             | -                      | GP 28439                                 | Dinsdale et al., Nature 2008 [13] | -        |
| HighSalternSDbayMic20051128 | microbial | Aquatic         | Hypersaline   | High saltern SD 200511 | GP 28453                                 | Dinsdale et al., Nature 2008 [13] | 3,407.29 |
| HighSalternSDbayMicD200407  | microbial | Aquatic         | Hypersaline   | High saltern SD        | GP 40795                                 | -                                 | 3,275.39 |
| HighSalternSDbayVir20051116 | viral     | Aquatic         | Hypersaline   | High saltern SD        | GP 28457                                 | Dinsdale et al., Nature 2008 [13] | 51.73    |
| HighSalternSDbayVir20051128 | viral     | Aquatic         | Hypersaline   | High saltern SD 200511 | GP 28451                                 | Dinsdale et al., Nature 2008 [13] | 267.95   |
| HighSalternSDbayVir20051207 | viral     | Aquatic         | Hypersaline   | High saltern SD        | GP 28447                                 | Dinsdale et al., Nature 2008 [13] | -        |
| Hot10Mic20021007            | microbial | Aquatic         | Ocean         | -                      | GSS DU731018-DU796676, DU800850-DU800864 | DeLong et al., Science 2006 [18]  | 1,838.16 |
| Hot130Mic20021006           | microbial | Aquatic         | Ocean         | -                      | GSS DU731018-DU796676, DU800850-DU800864 | DeLong et al., Science 2006 [18]  | 3,849.65 |
| Hot200Mic20021006           | microbial | Aquatic         | Ocean         | -                      | GSS DU731018-DU796676, DU800850-DU800864 | DeLong et al., Science 2006 [18]  | 1,868.80 |
| Hot4000Mic20031221          | microbial | Aquatic         | Ocean         | -                      | GSS DU731018-DU796676, DU800850-DU800864 | DeLong et al., Science 2006 [18]  | 3,664.53 |
| Hot500Mic10021006           | microbial | Aquatic         | Ocean         | -                      | GSS DU731018-                            | DeLong et al., Science 2006 [18]  | 3,981.13 |

|                                 |           |                 |             |                    |  |                                                        |                                                |          |
|---------------------------------|-----------|-----------------|-------------|--------------------|--|--------------------------------------------------------|------------------------------------------------|----------|
|                                 |           |                 |             |                    |  | DU796676,<br>DU800850-<br>DU800864                     |                                                |          |
| Hot70Mic20021007                | microbial | Aquatic         | Ocean       | -                  |  | GSS<br>DU731018-<br>DU796676,<br>DU800850-<br>DU800864 | DeLong et al.,<br>Science 2006 [18]            | 2,157.18 |
| Hot770Mic20031221               | microbial | Aquatic         | Ocean       | -                  |  | GSS<br>DU731018-<br>DU796676,<br>DU800850-<br>DU800864 | DeLong et al.,<br>Science 2006 [18]            | 2,597.30 |
| HumanFecesSDVir                 | viral     | Host-associated | -           | -                  |  | GSS<br>CC820769-<br>CC821300                           | Breitbart et al., J.<br>Bacteriol. 2003 [19]   | -        |
| KingLIMic20050821               | microbial | Aquatic         | Ocean       | Kingman island     |  | GP 28343                                               | Dinsdale et al.,<br>PLoS One 2008 [12]         | 2,911.81 |
| KingLIVir20050821               | viral     | Aquatic         | Ocean       | Kingman island     |  | GP 28345                                               | Dinsdale et al.,<br>PLoS One 2008 [12]         | 154.43   |
| LeanMouseCecumMic2005           | microbial | Host-associated | -           | -                  |  | GP 17401                                               | Turnbaugh et al.,<br>Nature 2006 [20]          | 3,144.82 |
| LowSalternSDbayMic200407        | microbial | Aquatic         | Hypersaline | Low saltern 200407 |  | GP 28359                                               | Dinsdale et al.,<br>Nature 2008 [13]           | 4,564.80 |
| LowSalternSDbayMic20051128      | microbial | Aquatic         | Hypersaline | Low saltern 200511 |  | GP 28461                                               | Dinsdale et al.,<br>Nature 2008 [13]           | 1,664.29 |
| LowSalternSDbayVir200407        | viral     | Aquatic         | Hypersaline | Low saltern 200407 |  | GP 28353                                               | Dinsdale et al.,<br>Nature 2008 [13]           | 67.90    |
| LowSalternSDbayVir20051110      | viral     | Aquatic         | Hypersaline | -                  |  | GP 28373                                               | Dinsdale et al.,<br>Nature 2008 [13]           | 92.07    |
| LowSalternSDbayVir20051128      | viral     | Aquatic         | Hypersaline | Low saltern 200511 |  | GP 28455                                               | Dinsdale et al.,<br>Nature 2008 [13]           | 64.41    |
| MarineBacterioplanktonS35131Euk | eukaryal  | Aquatic         | Ocean       | -                  |  | CA<br>BACTERIOPL<br>ANKTON_SM<br>PL_S_35131            | Hewson et al.,<br>Limnol Oceanogr<br>2009 [21] | 804.70   |
| MarineBacterioplanktonS35139Euk | eukaryal  | Aquatic         | Ocean       | -                  |  | CA<br>BACTERIOPL<br>ANKTON_SM<br>PL_S_35139            | Hewson et al.,<br>Limnol Oceanogr<br>2009 [21] | 741.86   |
| MarineBacterioplanktonS35147Euk | eukaryal  | Aquatic         | Ocean       | -                  |  | CA<br>BACTERIOPL<br>ANKTON_SM<br>PL_S_35147            | Hewson et al.,<br>Limnol Oceanogr<br>2009 [21] | 809.65   |

|                                   |           |                 |             |                      |                                    |                                            |          |
|-----------------------------------|-----------|-----------------|-------------|----------------------|------------------------------------|--------------------------------------------|----------|
| MarineBacterio planktonS35155 Euk | eukaryal  | Aquatic         | Ocean       | -                    | CA BACTERIOPL ANKTON_SM PL_S_35155 | Hewson et al., Limnol Oceanogr 2009 [21]   | 971.31   |
| MarineBacterio planktonS35163 Euk | eukaryal  | Aquatic         | Ocean       | -                    | CA BACTERIOPL ANKTON_SM PL_S_35163 | Hewson et al., Limnol Oceanogr 2009 [21]   | 1,055.38 |
| MarineBacterio planktonS35171 Euk | eukaryal  | Aquatic         | Ocean       | -                    | CA BACTERIOPL ANKTON_SM PL_S_35171 | Hewson et al., Limnol Oceanogr 2009 [21]   | 779.40   |
| MarineBacterio planktonS35179 Euk | eukaryal  | Aquatic         | Ocean       | -                    | CA BACTERIOPL ANKTON_SM PL_S_35179 | Hewson et al., Limnol Oceanogr 2009 [21]   | 864.10   |
| MediterraneanB athypelagicEuk     | eukaryal  | Aquatic         | Ocean       | -                    | GSS EI942868-EI951915              | Martin-Cuadrado et al., PLoS ONE 2007 [22] | -        |
| MedSalternSDB ayMic20051110       | microbial | Aquatic         | Hypersaline | Med saltern 20051110 | GP 28377                           | Dinsdale et al., Nature 2008 [13]          | 4014.17  |
| MedSalternSDB ayMic20051111       | microbial | Aquatic         | Hypersaline | Med saltern          | GP 28379                           | Dinsdale et al., Nature 2008 [13]          | 3,451.03 |
| MedSalternSDB ayMic20051116       | microbial | Aquatic         | Hypersaline | Med saltern 20051116 | GP 28459                           | Dinsdale et al., Nature 2008 [13]          | 3,627.08 |
| MedSalternSDB ayMic20051128       | microbial | Aquatic         | Hypersaline | Med saltern 20051128 | GP 28449                           | Dinsdale et al., Nature 2008 [13]          | 3,613.68 |
| MedSalternSDB ayVir20051110       | viral     | Aquatic         | Hypersaline | Med saltern 20051110 | GP 28375                           | Dinsdale et al., Nature 2008 [13]          | 72.77    |
| MedSalternSDB ayVir20051116       | viral     | Aquatic         | Hypersaline | Med saltern 20051116 | GP 28465                           | Dinsdale et al., Nature 2008 [13]          | 61.41    |
| MedSalternSDB ayVir20051122       | viral     | Aquatic         | Hypersaline | Med saltern          | GP 28445                           | Dinsdale et al., Nature 2008 [13]          | 56.80    |
| MedSalternSDB ayVir20051128       | viral     | Aquatic         | Hypersaline | Med saltern 20051128 | GP 28463                           | Dinsdale et al., Nature 2008 [13]          | -        |
| Mosq1SDVir20 060125               | viral     | Host-associated | -           | -                    | GP 28413                           | Dinsdale et al., Nature 2008 [13]          | 4.39     |
| Mosq2SDVir20 60606                | viral     | Host-associated | -           | -                    | GP 28469                           | Dinsdale et al., Nature 2008 [13]          | 4.46     |
| Move858Vir                        | viral     | Aquatic         | Ocean       | Chesapeake Bay       | GP 13694                           | Rush et al., PLoS Biol. 2007 [15]          | -        |
| MushroomHotS pringMic             | microbial | Aquatic         | Hot spring  | -                    | GP 20953                           | Bhaya et al., ISME J., 2007 [23]           | 2,966.33 |
| Norm3LungVir                      | viral     | Host-           | -           | -                    | GP 39545                           | Willner et al., PLoS                       | 61.23    |

|                             |           |                         |               |                     |            |                                                          |          |
|-----------------------------|-----------|-------------------------|---------------|---------------------|------------|----------------------------------------------------------|----------|
| 20080407                    |           | associated              |               |                     |            | ONE 2009 [24]                                            |          |
| Norm4LungVir<br>20080407    | viral     | Host-associated         | -             | -                   | GP 39545   | Willner et al., PLoS ONE 2009 [24]                       | 20.51    |
| Norm5LungVir<br>20080407    | viral     | Host-associated         | -             | -                   | GP 39545   | Willner et al., PLoS ONE 2009 [24]                       | 57.05    |
| Norm6LungVir<br>20080407    | viral     | Host-associated         | -             | -                   | GP 39545   | Willner et al., PLoS ONE 2009 [24]                       | 49.29    |
| Norm7LungVir<br>20080407    | viral     | Host-associated         | -             | -                   | GP 39545   | Willner et al., PLoS ONE 2009 [24]                       | 58.24    |
| NutPorCompHawMic200602      | microbial | Manipulated / Perturbed | -             | Nutrient Pcomp      | GP 28437   | Vega Thurber et al., Env. Mic. 2009 [9]                  | 2,083.43 |
| NutPorCompHawVir200602      | viral     | Manipulated / Perturbed | -             | Nutrient Pcomp      | GP 28425   | Vega Thurber et al., Proc. Nat. Acad. Sci. USA 2008 [10] | 26.50    |
| OctopusHotSpringMic         | microbial | Aquatic                 | Hot spring    | Yellowstone Octopus | GP 20953   | Bhaya et al., ISME J., 2007 [17]                         | 3,006.73 |
| OctopusHotSpringVir         | viral     | Aquatic                 | Hot spring    | Yellowstone Octopus | GP 20821   | Pride et al., BMC Genomics 2008 [6]                      | -        |
| OxMinZoneVir<br>200806-200  | viral     | Aquatic                 | Ocean         | -                   | GP 40793   | -                                                        | -        |
| OxMinZoneVir<br>200806-90   | viral     | Aquatic                 | Ocean         | -                   | GP 40791   | -                                                        | 93.13    |
| PacificBeachSandEuk         | eukaryal  | Terrestrial             | -             | -                   | GP 13729   | Naviaux et al., Mar Ecol Prog Ser 2005 [25]              | -        |
| PalmLIMic20050818           | microbial | Aquatic                 | Ocean         | Palmyra island      | GP 28363   | Dinsdale et al., PLoS One 2008 [12]                      | 2,140.61 |
| PalmLIVir20050818           | viral     | Aquatic                 | Ocean         | Palmyra island      | GP 28365   | Dinsdale et al., PLoS One 2008 [12]                      | 163.41   |
| PANoVectorsBocasMic20050921 | microbial | Host-associated         | -             | -                   | GP 28371   | Wegley et al., Env. Mic. 2007 [26]                       | 3,236.71 |
| PASTromBahamasMic20050722   | microbial | Aquatic                 | Microbialites | Pozas               | GP 28385   | Dinsdale et al., Nature 2008 [13]                        | 4,504.51 |
| PASTromCCMexVir20050722     | viral     | Aquatic                 | Microbialites | Pozas               | GP 28355   | Desnues et al., Nature 2008 [17]                         | 17.26    |
| PeruvianCoastalMarginMic    | microbial | Aquatic                 | Ocean         | -                   | SRA 001015 | Biddle et al., Proc. Nat. Acad. Sci. USA 2008 [27]       | 2,521.81 |
| pHPorCompHawMic200602       | microbial | Manipulated / Perturbed | -             | pH Pcomp            | GP 28435   | Vega Thurber et al., Env. Mic. 2009 [9]                  | 2,178.71 |
| pHPorCompHawVir             | viral     | Manipulated             | -             | pH Pcomp            | GP 28423   | Vega Thurber et al.,                                     | 39.92    |

|                              |           |                     |               |                               |                              |                                                       |          |
|------------------------------|-----------|---------------------|---------------|-------------------------------|------------------------------|-------------------------------------------------------|----------|
| wVir200602                   |           | / Perturbed         |               |                               |                              | Proc. Nat. Acad. Sci. USA 2008 [10]                   |          |
| PrarieSoilKonz<br>aVir       | viral     | Terrestrial         | -             | -                             | GSS ER781257-<br>ER785833    | Fierer et al., Appl. Environ. Microb. 2007 [11]       | -        |
| PrePondKentST<br>Mic20060504 | microbial | Aquatic             | Fresh water   | Kent<br>SeaTech<br>Pre 200605 | GP 28407                     | Dinsdale et al., Nature 2008 [13]                     | 4,049.11 |
| PrePondKentST<br>Vir20060504 | viral     | Aquatic             | Fresh water   | Kent<br>SeaTech<br>Pre 200605 | GP 28411                     | Dinsdale et al., Nature 2008 [13]                     | 47.00    |
| RainforestSoilP<br>eruVir    | viral     | Terrestrial         | -             | -                             | GSS ER781257-<br>ER785833    | Fierer et al., Appl. Environ. Microb. 2007 [11]       | -        |
| RicePaddySoil<br>Vir         | viral     | Terrestrial         | -             | -                             | GP 20811                     | Kim et al., Appl. Environ. Microb. 2008 [28]          | -        |
| RMStromCCM<br>exMic20050722  | microbial | Aquatic             | Microbialites | Mexico                        | GP 28351                     | Dinsdale et al., Nature 2008 [13]                     | 5,061.41 |
| RMStromCCM<br>exVir20050722  | viral     | Aquatic             | Microbialites | Mexico                        | GP 28357                     | Desnues et al., Nature 2008 [13]                      | 50.27    |
| Rumen640FMic<br>20051215     | microbial | Host-<br>associated | -             | -                             | GP 28607                     | Dinsdale et al., Nature 2008 [13]                     | 3,331.03 |
| Rumen710FMic<br>20051215     | microbial | Host-<br>associated | -             | -                             | GP 28609                     | Dinsdale et al., Nature 2008 [13]                     | 2,938.60 |
| Rumen80FMic2<br>0051215      | microbial | Host-<br>associated | -             | -                             | GP 28605                     | Dinsdale et al., Nature 2008 [13]                     | 1,867.34 |
| SaltonSea1Vir2<br>0060823    | viral     | Sediments           | -             | Salton Sea                    | GP 28613                     | Dinsdale et al., Nature 2008 [13]                     | 88.67    |
| SaltonSea2Vir2<br>0060823    | viral     | Sediments           | -             | Salton Sea                    | GP 28613                     | Dinsdale et al., Nature 2008 [13]                     | 82.61    |
| SaltonSeaMic2<br>0060823     | microbial | Sediments           | -             | Salton Sea                    | GP 28613                     | Dinsdale et al., Nature 2008 [13]                     | 3,806.14 |
| SARVir200506<br>30           | viral     | Aquatic             | Ocean         | Sargasso<br>Sea               | GP 17771                     | Angly et al., PLoS Biology 2006 [4]                   | 19.95    |
| SeawaterMissio<br>nBaySDVir  | viral     | Aquatic             | Ocean         | -                             | GSS<br>BH898061-<br>BH898933 | Breitbart et al., Proc. Nat. Acad. Sci. USA 2002 [29] | -        |
| SeawaterScripp<br>sSDVir     | viral     | Aquatic             | Ocean         | -                             | GSS<br>AY079522-<br>AY080585 | Breitbart et al., Proc. Nat. Acad. Sci. USA 2002 [29] | -        |
| SedimentsMissi<br>onBaySDVir | viral     | Sediments           | -             | -                             | GB CC821301-<br>CC822456     | Breitbart et al., Proc. R. Soc. B. 2004 [30]          | -        |
| SkanBayAlaska                | viral     | Aquatic             | Ocean         | -                             | GP 28619                     | Dinsdale et al.,                                      | -        |



|                            |           |                         |             |                           |              |                                                          |          |
|----------------------------|-----------|-------------------------|-------------|---------------------------|--------------|----------------------------------------------------------|----------|
| Vir20060927                |           |                         |             |                           |              | Nature 2008 [13]                                         |          |
| SoilCC1Mic                 | microbial | Terrestrial             | -           | -                         | MG 4441690.3 | -                                                        | 6,063.12 |
| SoilCP1Mic                 | microbial | Terrestrial             | -           | -                         | MG 4441689.3 | -                                                        | 5,927.76 |
| SoilCP3Mic                 | microbial | Terrestrial             | -           | -                         | MG 4441691.3 | -                                                        | 5,776.93 |
| SoilHF1Mic                 | microbial | Terrestrial             | -           | -                         | MG 4441642.3 | -                                                        | 5,887.77 |
| SoilKP1Mic                 | microbial | Terrestrial             | -           | -                         | MG 4441994.3 | -                                                        | 5,952.04 |
| SoilKP3Mic                 | microbial | Terrestrial             | -           | -                         | MG 4441643.3 | -                                                        | 5,777.56 |
| SoilKW1Mic                 | microbial | Terrestrial             | -           | -                         | MG 4441664.3 | -                                                        | 5,741.19 |
| SoilKW2Mic                 | microbial | Terrestrial             | -           | -                         | MG 4441691.4 | -                                                        | 5,766.49 |
| SoilLF1Mic                 | microbial | Terrestrial             | -           | -                         | MG 4442455.3 | -                                                        | 6,181.55 |
| SoilLF2Mic                 | microbial | Terrestrial             | -           | -                         | MG 4441644.3 | -                                                        | 6,131.82 |
| SoilSJ1Mic                 | microbial | Terrestrial             | -           | -                         | MG 4441557.3 | -                                                        | 5,995.31 |
| SoilSJ2Mic                 | microbial | Terrestrial             | -           | -                         | MG 4441645.3 | -                                                        | 5,974.06 |
| SoilTF1Mic                 | microbial | Terrestrial             | -           | -                         | MG 4441688.3 | -                                                        | 6,119.44 |
| SoilTF2Mic                 | microbial | Terrestrial             | -           | -                         | MG 4442452.3 | -                                                        | 6,312.57 |
| SoilWF1Mic                 | microbial | Terrestrial             | -           | -                         | MG 4441556.3 | -                                                        | 5,812.88 |
| SoilWF2Mic                 | microbial | Terrestrial             | -           | -                         | MG 4441665.3 | -                                                        | 5,632.30 |
| SoilYN1Mic                 | microbial | Terrestrial             | -           | -                         | MG 4442453.3 | -                                                        | 5,960.67 |
| SoilYN2Mic                 | microbial | Terrestrial             | -           | -                         | MG 4441687.3 | -                                                        | 5,899.56 |
| SouthChinaSea SedimentsMic | microbial | Sediments               | -           | -                         | GP 33581     | -                                                        | 4,941.46 |
| T0PortComHawMic20060223    | microbial | Host-associated         | -           | Coral tissue P. compressa | GP 28427     | Vega Thurber et al., Env. Mic. 2009 [9]                  | 3,618.00 |
| T0PortComHawVir20060223    | viral     | Host-associated         | -           | Coral tissue P. compressa | GP 28415     | Vega Thurber et al., Proc. Nat. Acad. Sci. USA 2008 [10] | 43.07    |
| TempPorCompHawMic200602    | microbial | Manipulated / Perturbed | -           | Temperature Pcomp         | GP 28431     | Vega Thurber et al., Env. Mic. 2009 [9]                  | 4,560.68 |
| TempPorCompHawVir200602    | viral     | Manipulated / Perturbed | -           | Temperature Pcomp         | GP 28419     | Vega Thurber et al., Proc. Nat. Acad. Sci. USA 2008 [10] | 30.80    |
| TilPondKentSTMic200511     | microbial | Aquatic                 | Fresh water | Kent SeaTech Tpond 200511 | GP 28387     | Dinsdale et al., Nature 2008 [13]                        | 4,204.22 |
| TilPondKentSTMic20060504   | microbial | Aquatic                 | Fresh water | Kent SeaTech Tpond 200605 | GP 28405     | Dinsdale et al., Nature 2008 [13]                        | 4,007.80 |
| TilPondKentST              | microbial | Aquatic                 | Fresh water | Kent                      | GP 28603     | Dinsdale et al.,                                         | 4,689.22 |

|                              |           |             |             |                                    |          |                                           |          |
|------------------------------|-----------|-------------|-------------|------------------------------------|----------|-------------------------------------------|----------|
| Mic200608                    |           |             |             | SeaTech<br>Tpond<br>200608         |          | Nature 2008 [13]                          |          |
| TilPondKentST<br>Vir20060504 | viral     | Aquatic     | Fresh water | Kent<br>SeaTech<br>Tpond<br>200605 | GP 28409 | Dinsdale et al.,<br>Nature 2008 [13]      | 34.45    |
| TilPondKentST<br>Vir200608   | viral     | Aquatic     | Fresh water | Kent<br>SeaTech<br>Tpond<br>200608 | GP 28601 | Dinsdale et al.,<br>Nature 2008 [13]      | 51.03    |
| TpondKentSTV<br>ir200511     | viral     | Aquatic     | Fresh water | Kent<br>SeaTech<br>Tpond<br>200511 | GP 28361 | Dinsdale et al.,<br>Nature 2008 [13]      | 35.71    |
| WasecaFarmSoi<br>IMic        | microbial | Terrestrial | -           | -                                  | GP 13699 | Tringe SG et al.,<br>Science, 2005 [31]   | 5,350.40 |
| XmasLIMic200<br>50805        | microbial | Aquatic     | Ocean       | Christmas<br>island                | GP 28347 | Dinsdale et al.,<br>PLoS One 2008<br>[12] | 3,483.52 |
| XmasLIVir200<br>50805        | viral     | Aquatic     | Ocean       | Christmas<br>island                | GP 28349 | Dinsdale et al.,<br>PLoS One 2008<br>[12] | 158.48   |

#### References:

1. Allen HK, Moe LA, Rodbumrer J, Gaarder A, Handelsman J (2008) Functional metagenomics reveals diverse beta-lactamases in a remote Alaskan soil. *ISME J* 3: 243-251.
2. Legault B, Lopez-Lopez A, Alba-Casado J, Doolittle WF, Bolhuis H, et al. (2006) Environmental genomics of "Haloquadratum walsbyi" in a saltern crystallizer indicates a large pool of accessory genes in an otherwise coherent species. *BMC Genomics* 7: 171.
3. Grzymiski JJ, Murray AE, Campbell BJ, Kaplarevic M, Gao GR, et al. (2008) Metagenome analysis of an extreme microbial symbiosis reveals eurythermal adaptation and metabolic flexibility. *Proceedings of the National Academy of Sciences* 105: 17516-17521.
4. Angly FE, Felts B, Breitbart M, Salamon P, Edwards RA, et al. (2006) The marine viromes of four oceanic regions. *PLoS Biology* 4: e368.
5. Breitbart M, Haynes M, Kelley S, Angly F, Edwards RA, et al. (2008) Viral diversity and dynamics in an infant gut. *Res Microbiol* 159: 367-373.
6. Pride D, Schoenfeld T (2008) Genome signature analysis of thermal virus metagenomes reveals Archaea and thermophilic signatures. *BMC Genomics* 9: 420.

7. Bench SR, Hanson TE, Williamson KE, Ghosh D, Radosovich M, et al. (2007) Metagenomic characterization of Chesapeake Bay viroplankton. *Appl Environ Microbiol* 73: 7629-7641.
8. Qu A, Brule JM, Wilson MK, Law BF, Theoret JR, et al. (2008) Comparative metagenomics reveals host specific metavirulomes and horizontal gene transfer elements in the chicken cecum microbiome. *PLoS ONE* 3: e2945.
9. Thurber RV, Willner-Hall D, Rodriguez-Mueller B, Desnues C, Edwards RA, et al. (2009) Metagenomic analysis of stressed coral holobionts. *Environ Microbiol* 11: 2148-2163.
10. Vega Thurber RL, Barott KL, Hall D, Liu H, Rodriguez-Mueller B, et al. (2008) Metagenomic analysis indicates that stressors induce production of herpes-like viruses in the coral *Porites compressa*. *Proc Nat Acad Sci USA* 105: 18413-18418.
11. Fierer N, Breitbart M, Nulton J, Salamon P, Lozupone C, et al. (2007) Metagenomic and small-subunit rRNA analyses reveal the genetic diversity of Bacteria, Archaea, Fungi, and viruses in soil. *Appl Environ Microbiol* 73: 7059-7066.
12. Dinsdale EA, Pantos O, Smriga S, Edwards RA, Angly F, et al. (2008) Microbial ecology of four coral atolls in the northern Line Islands. *PLoS ONE* 3: e1584.
13. Dinsdale EA, Edwards RA, Hall D, Angly F, Breitbart M, et al. (2008) Functional metagenomic profiling of nine biomes. *Nature* 452: 629-632.
14. Venter JC, Remington K, Heidelberg JF, Halpern AL, Rusch D, et al. (2004) Environmental genome shotgun sequencing of the Sargasso Sea. *Science* 304: 66-74.
15. Rusch DB, Halpern AL, Sutton G, Heidelberg KB, Williamson S, et al. (2007) The Sorcerer II global ocean sampling expedition: northwest Atlantic through eastern tropical Pacific. *PLoS Biol* 5: e77.
16. Woyke T, Teeling H, Ivanova NN, Huntemann M, Richter M, et al. (2006) Symbiosis insights through metagenomic analysis of a microbial consortium. *Nature* 443: 950-955.
17. Desnues C, Rodriguez-Brito B, Rayhawk S, Kelley S, Tran T, et al. (2008) Biodiversity and biogeography of phages in modern stromatolites and thrombolites. *Nature* 452: 340-343.
18. DeLong EF, Preston CM, Mincer T, Rich V, Hallam SJ, et al. (2006) Community genomics among stratified microbial assemblages in the ocean's interior. *Science* 311: 496-503.
19. Breitbart M, Hewson I, Felts B, Mahaffy JM, Nulton J, et al. (2003) Metagenomic analyses of an uncultured viral community from human feces. *J Bacteriol* 185: 6220-6223.

20. Turnbaugh PJ, Ley RE, Mahowald MA, Magrini V, Mardis ER, et al. (2006) An obesity-associated gut microbiome with increased capacity for energy harvest. *Nature* 444: 1027-131.
21. Hewson I, Paerl RW, Tripp HJ, Zehr JP, Karl DM (2009) Metagenomic potential of microbial assemblages in the surface waters of the central Pacific Ocean tracks variability in oceanic habitat. *Limnol Oceanogr* 54: 1981-1994.
22. Martín-Cuadrado A, López-García P, Alba J, Moreira D, Monticelli L, et al. (2007) Metagenomics of the deep mediterranean, a warm bathypelagic habitat. *PLoS ONE* 2: e914.
23. Bhaya D, Grossman AR, Steunou A, Khuri N, Cohan FM, et al. (2007) Population level functional diversity in a microbial community revealed by comparative genomic and metagenomic analyses. *ISME J* 1: 703-713.
24. Willner D, Furlan M, Haynes M, Schmieder R, Angly FE, et al. (2009) Metagenomic analysis of respiratory tract DNA viral communities in cystic fibrosis and non-cystic fibrosis Individuals. *PLoS ONE* 4: e7370.
25. Naviaux RK, Good B, McPherson JD, Steffen DL, Markusic D, et al. (2005) Sand DNA - a genetic library of life at the water's edge. *Mar Ecol Prog Ser* 301: 9-22.
26. Wegley L, Edwards R, Rodriguez-Brito B, Liu H, Rohwer F (2007) Metagenomic analysis of the microbial community associated with the coral *Porites astreoides*. *Environmental Microbiology* 9: 2707-2719.
27. Biddle JF, Fitz-Gibbon S, Schuster SC, Brenchley JE, House CH (2008) Metagenomic signatures of the Peru Margin seafloor biosphere show a genetically distinct environment. *Proc Nat Acad Sci USA* 105: 10583-10588.
28. Kim K, Chang H, Nam Y, Roh SW, Kim M, et al. (2008) Amplification of uncultured single-stranded DNA viruses from rice paddy soil. *Appl Environ Microbiol* 74: 5975-5985.
29. Breitbart M, Salamon P, Andresen B, Mahaffy J, Segall A, et al. (2002) Genomic analysis of uncultured marine viral communities. *Proc Nat Acad Sci USA* 99: 14250-14255.
30. Breitbart M, Felts B, Kelley S, Mahaffy JM, Nulton J, et al. (2004) Diversity and population structure of a near-shore marine-sediment viral community. *Proc R Soc B* 271: 565-574.
31. Tringe SG, von Mering C, Kobayashi A, Salamov AA, Chen K, et al. (2005) Comparative metagenomics of microbial communities. *Science* 308: 554-557.
